# Supplementary material for: Reversible Room Temperature H2 Gas Sensing Based on Self-Assembled Cobalt Oxysulfide
Source: MDPI journal article supplement (doi:10.3390/s22010303), 2021-12-31
Supplement: s1 [file s1]

# Supporting Information

Reversible room temperature H<sub>2</sub> gas sensing based on self-assembled cobalt oxysulfide

**Hui Zhou<sup>1</sup>, Kai Xu<sup>2,\*</sup>, Nam Ha<sup>2</sup>, Yinfen Cheng<sup>1</sup>, Rui Ou<sup>2</sup>, Qijie Ma<sup>2</sup>, Yihong Hu<sup>2</sup>, Vien Trinh<sup>2</sup>,  
Guanghui Ren<sup>2</sup>, Zhong Li<sup>1,\*</sup>, Jian Zhen Ou<sup>1,2,\*</sup>**

<sup>1</sup> Key Laboratory of Advanced Technologies of Materials, Ministry of Education, School of Materials Science and Engineering, Southwest Jiaotong University, Chengdu 610031, China

<sup>2</sup> School of Engineering, RMIT University, Melbourne, Victoria 3000, Australia

\* Correspondence: kai.xu@rmit.edu.au (K.X.); zhong.li@swjtu.edu.cn (Z.L.); jianzhen.ou@rmit.edu.au (J.Z.O.)

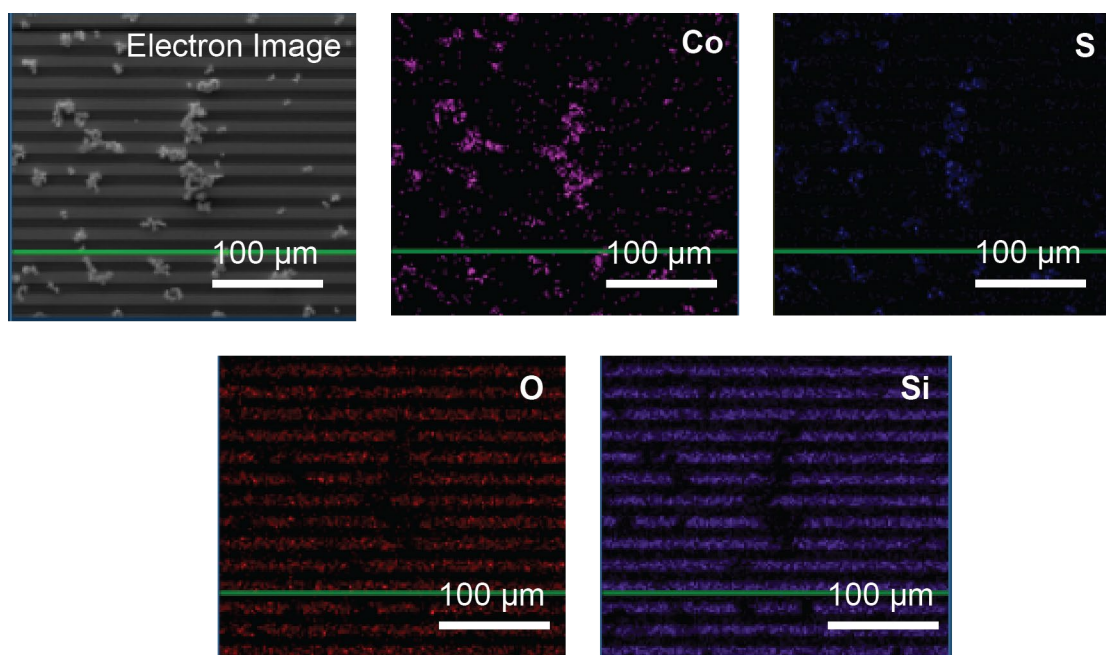

**Figure S1.** EDS measurement of the hexagonal cobalt sulfide particles upon a  $\text{SiO}_2$  substrate.

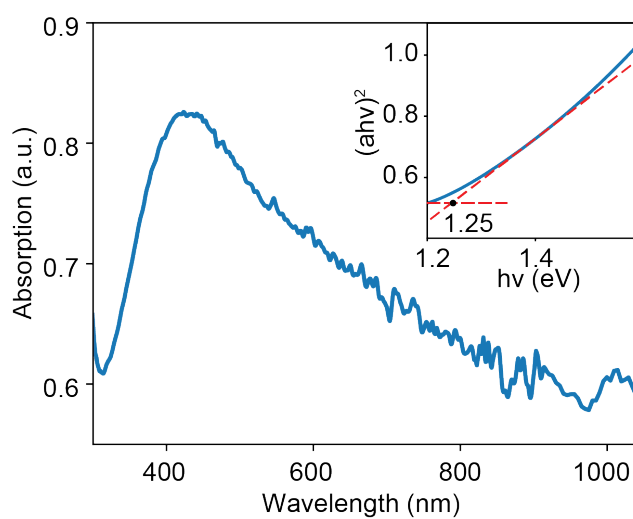

**Figure S2.** UV-Vis-NIR absorption spectra of CoS with the corresponding Tauc-plot in the inset.

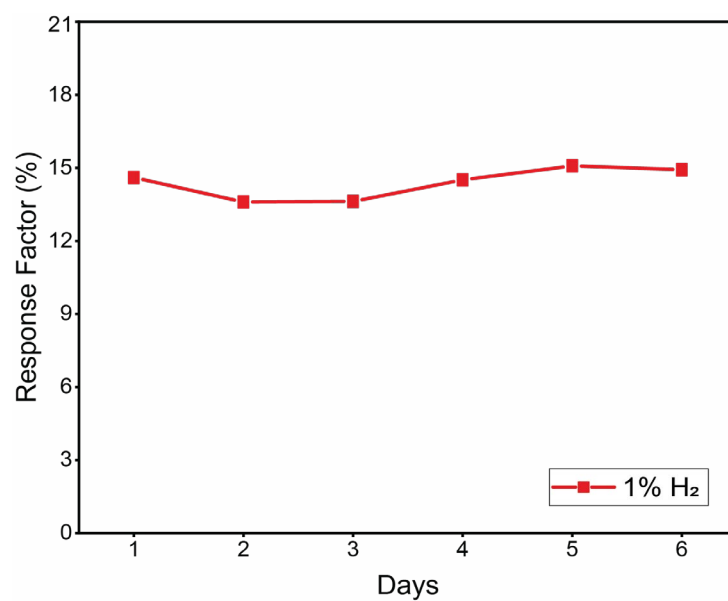

**Figure S3.** Long term stability experiment for cobalt oxysulfide sensor towards 1% H<sub>2</sub> for a week.

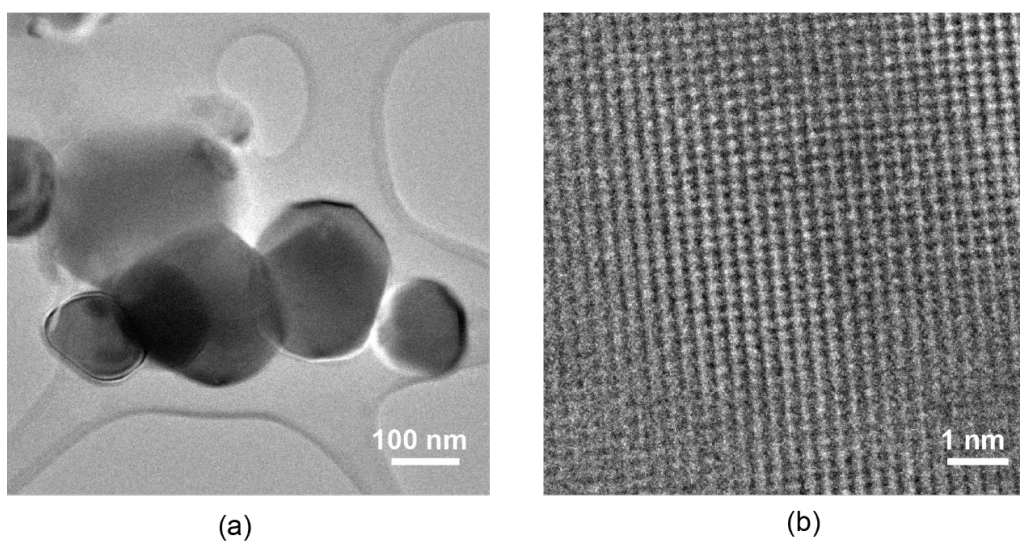

**Figure S4.** (a) Low resolution TEM and (b) HRTEM images for cobalt oxysulfide taken after long-term stability test.

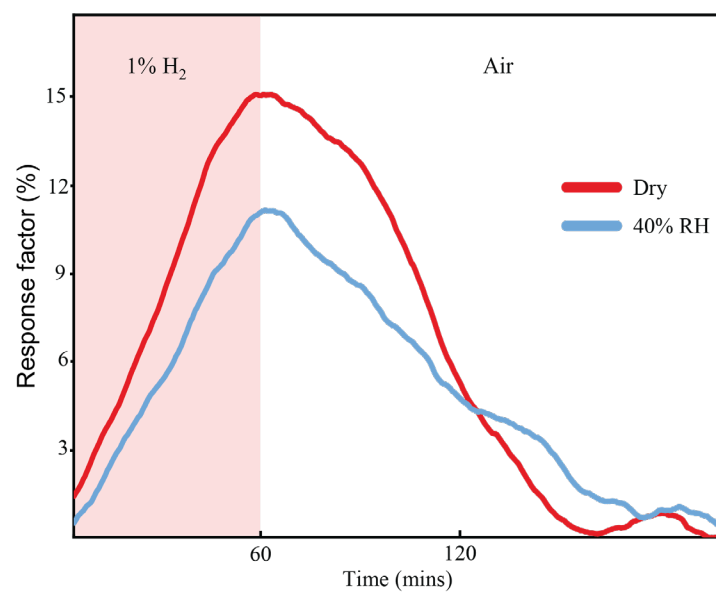

**Figure S5.** The response curve of cobalt oxysulfide sensor towards 1% H<sub>2</sub> in the dry, and 40% RH.
